# Supplementary material
Source: PubMed Central journal article supplement (PMC5562965)
Supplement: supp_WNL.0000000000004241_Table_e-1.pdf [file supp_WNL.0000000000004241_Table_e-1.pdf]

**Supplementary Table e-1. Classification of the ASIA Impairment Scale (AIS)**

\*

| <b>AIS Grade</b> | <b>Injury Description</b> | <b>Explanation</b>                                                                                                                                                                                                          |
|------------------|---------------------------|-----------------------------------------------------------------------------------------------------------------------------------------------------------------------------------------------------------------------------|
| A                | Complete                  | No sensory or motor function is preserved in the sacral segments (S4-5).                                                                                                                                                    |
| B                | Sensory incomplete        | Sensory but not motor function is preserved below the neurological level and includes the sacral segments S4-5 AND no motor function is preserved more than three levels below the motor level on either side of the body.  |
| C                | Motor incomplete          | Motor function is preserved below the neurological level and more than half of key muscle functions below the neurological level have a muscle grade <3.                                                                    |
| D                | Motor incomplete          | Motor function is preserved below the neurological level and at least half of key muscle functions below the neurological level have a muscle grade >3.                                                                     |
| E                | Normal                    | If sensation and motor function as tested with the ISNCSCI are graded as normal in all segments, and the patient had prior deficits, then the AIS grade is E. Someone without an initial SCI does not receive an AIS grade. |

\*For more detailed information<sup>1</sup>

1. Kirshblum SC, Burns SP, Biering-Sorensen F, et al. International standards for neurological classification of spinal cord injury (Revised 2011). J Spinal Cord Med. 2011;34:535–546.
